CORRECTION

# Correction: A New Application of Parallel Synthesis Strategy for Discovery of Amide-Linked Small Molecules as Potent Chondroprotective Agents in TNF- $\alpha$ -Stimulated Chondrocytes

The *PLOS ONE* Staff

The following information is missing from the Funding section: This study was supported by a National Science Council Grant (NSC 102-2314-B-016-049-MY3), the Ministry of Science and Technology (MOST103-2113-M-038-002), Taipei Medical University (TMU102-AE1-B32), and Tri-Service General Hospital (TSGH-C103-070 and TSGH-C104-068). The publisher apologizes for this error.

## Reference

1. Lee C-C, Lo Y, Ho L-J, Lai J-H, Lien S-B, Lin L-C, et al. (2016) A New Application of Parallel Synthesis Strategy for Discovery of Amide-Linked Small Molecules as Potent Chondroprotective Agents in TNF- $\alpha$ -Stimulated Chondrocytes. *PLoS ONE* 11(3): e0149317. doi:[10.1371/journal.pone.0149317](https://doi.org/10.1371/journal.pone.0149317) PMID: [26963090](https://pubmed.ncbi.nlm.nih.gov/26963090/)

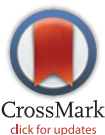

## OPEN ACCESS

**Citation:** The *PLOS ONE* Staff (2016) Correction: A New Application of Parallel Synthesis Strategy for Discovery of Amide-Linked Small Molecules as Potent Chondroprotective Agents in TNF- $\alpha$ -Stimulated Chondrocytes. *PLoS ONE* 11(4): e0154067. doi:[10.1371/journal.pone.0154067](https://doi.org/10.1371/journal.pone.0154067)

**Published:** April 14, 2016

**Copyright:** © 2016 The PLOS ONE Staff. This is an open access article distributed under the terms of the [Creative Commons Attribution License](https://creativecommons.org/licenses/by/4.0/), which permits unrestricted use, distribution, and reproduction in any medium, provided the original author and source are credited.
